# Supplementary material for: The antioxidant N-acetyl cysteine suppresses lidocaine-induced intracellular reactive oxygen species production and cell death in neuronal SH-SY5Y cells
Source: PubMed Central journal article supplement (PMC5078905; doi:10.1186/s12871-016-0273-3), 2016-10-24

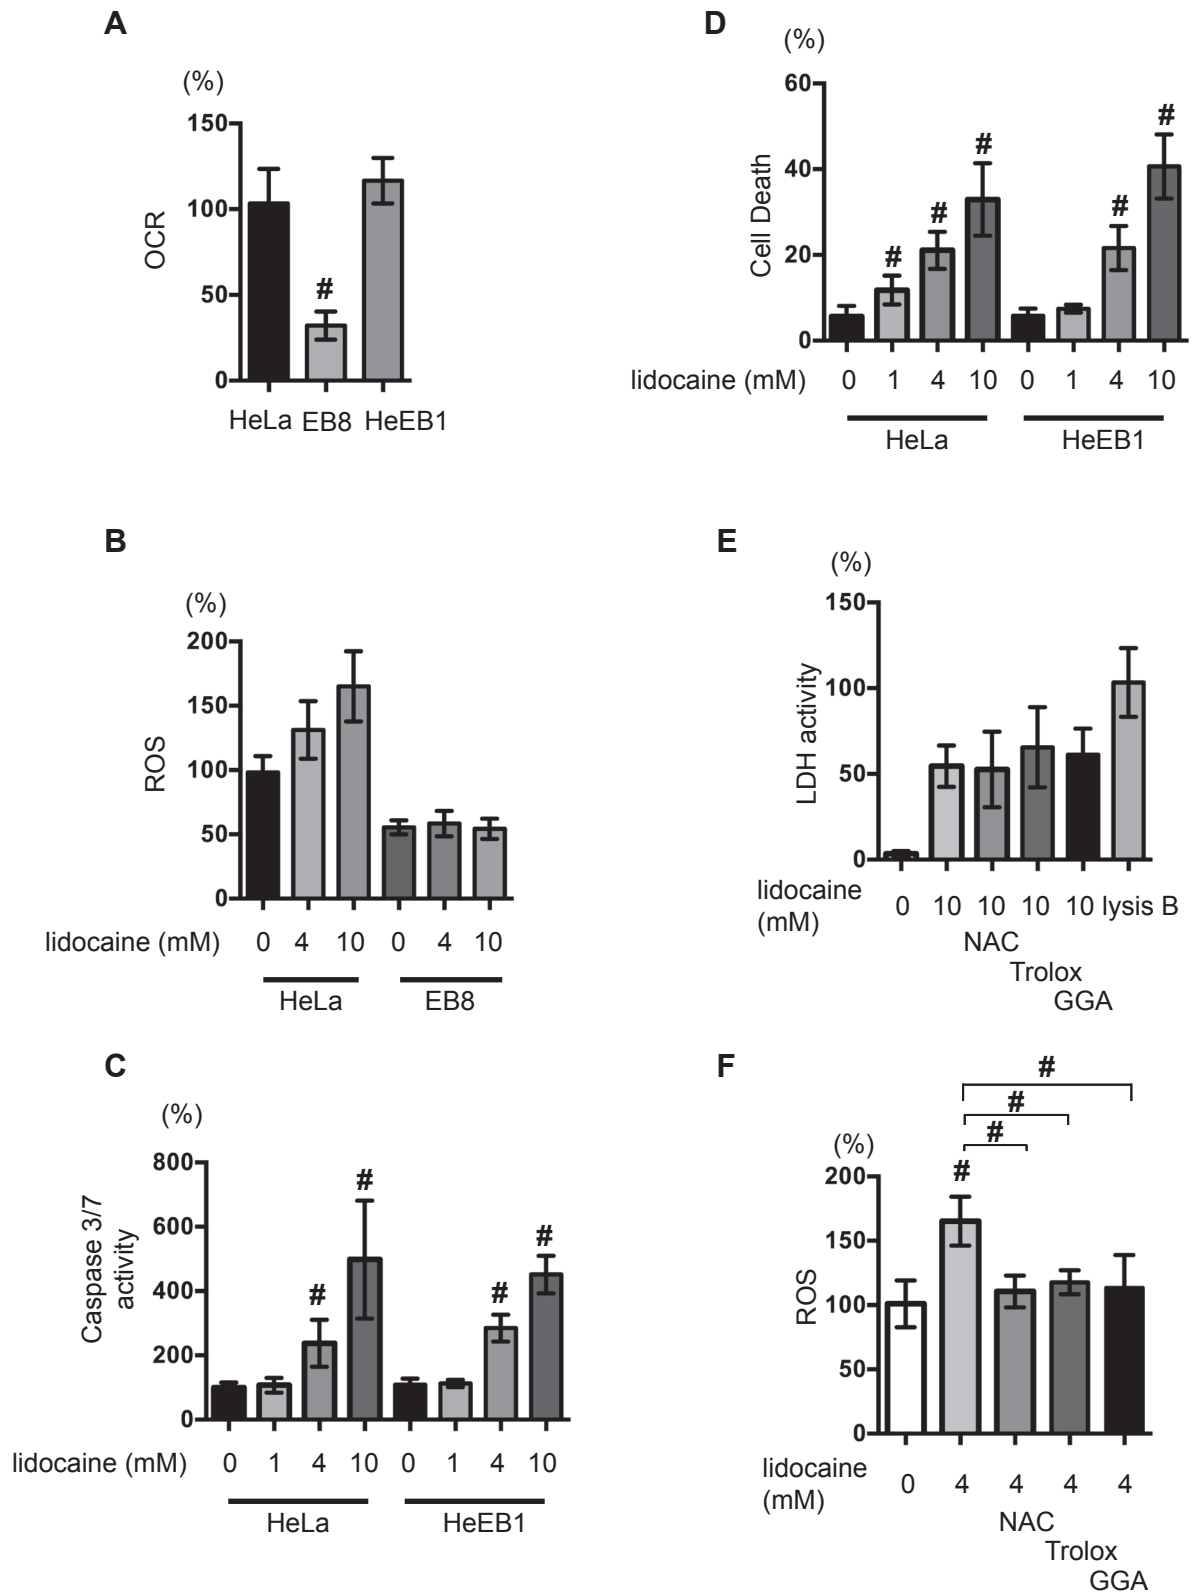

Supplement: 12871_2016_273_MOESM3_ESM.pdf [file 12871_2016_273_MOESM3_ESM.pdf]
